# Supplementary material for: High Performance Tunable Catalysts Prepared by Using 3D Printing
Source: MDPI journal article supplement (doi:10.3390/ma14175017), 2021-09-02
Supplement: s1 [file s1]

# Supplementary Materials: High Performance Tunable Catalysts Prepared by Using 3D Printing

Cristian Yesid Chaparro-Garnica <sup>1</sup>, Esther Bailón-García <sup>1,2,\*</sup>, Arantxa Davó-Quiñonero <sup>1</sup>, Patrick Da Costa <sup>3</sup>, Dolores Lozano-Castelló <sup>1</sup> and Agustín Bueno-López <sup>1</sup>

<sup>1</sup> Department of Inorganic Chemistry, University of Alicante, Carretera de San Vicente del Raspeig s/n, 03080 Alicante, Spain; cristian.chaparro@gcloud.ua.es (C.Y.C.-G.); arantxa.davo@tcd.ie (A.D.-Q.); d.lozano@ua.es (D.L.-C.); agus@ua.es (A.B.-L.)

<sup>2</sup> Carbon Materials Research Group, Department of Inorganic Chemistry, Faculty of Sciences, Campus Fuentenueva s/n, University of Granada, 18071 Granada, Spain

<sup>3</sup> Institut Jean Le Rond d'Alembert, CNRS UMR 7190, 2 Place de la Gare de Ceinture, Sorbonne Université, 78210 Saint Cyr L'Ecole, France; patrick.da\_costa@sorbonne-universite.fr

\* Correspondence: estherbg@ugr.es

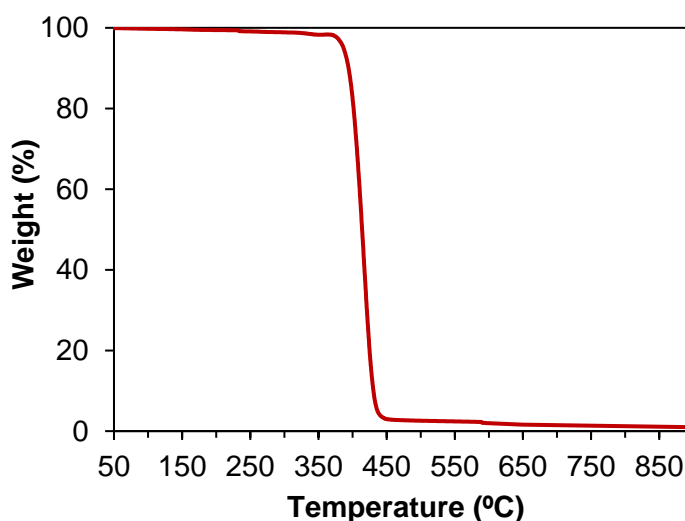

**Figure S1.** Thermogravimetric analysis of CPE+ template under N<sub>2</sub> atmosphere.

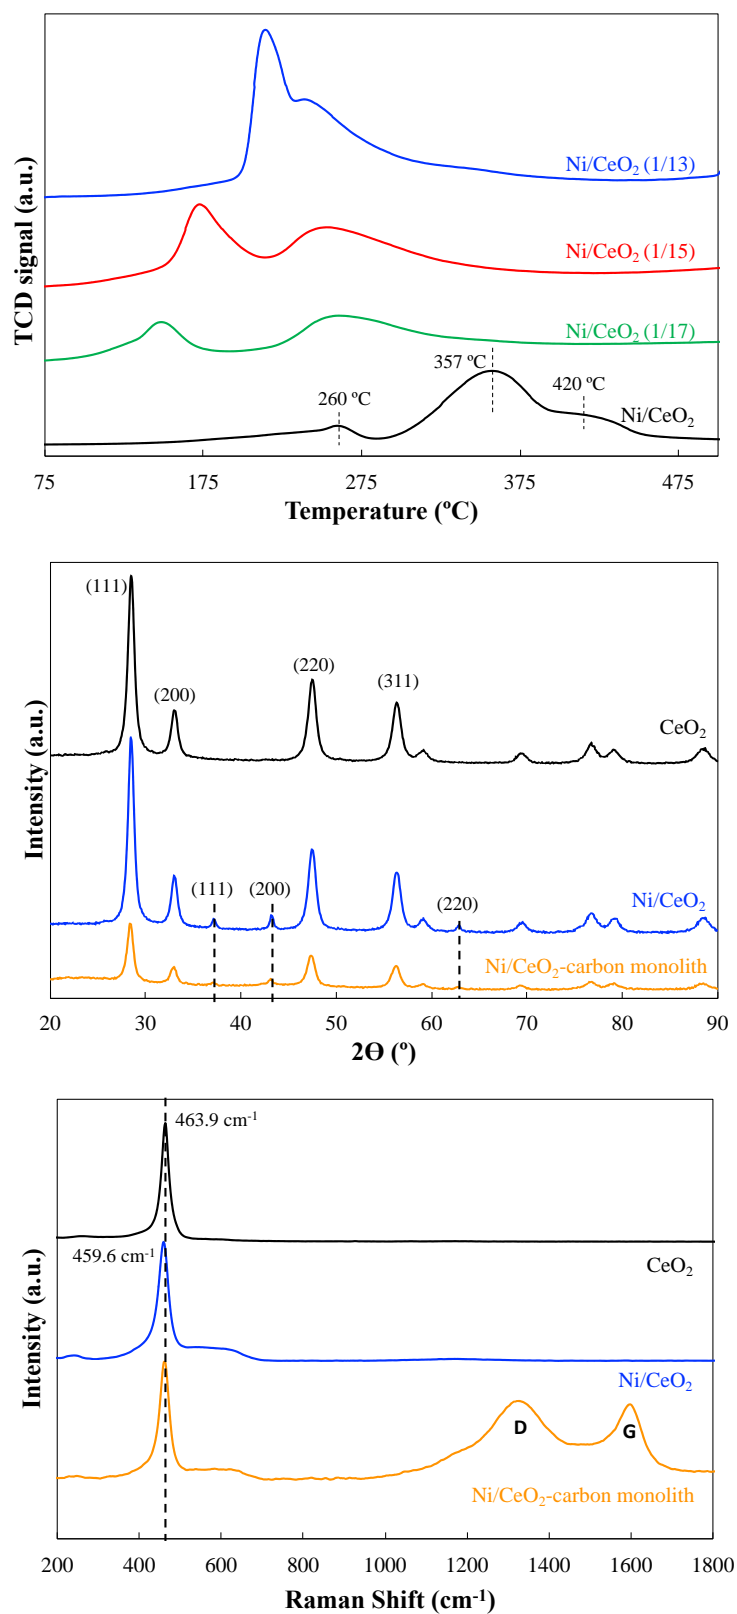

**Figure S2.** A) H<sub>2</sub>-TPR profiles and B) XRD and C) Raman patterns of  $\text{CeO}_2$  and  $\text{Ni/CeO}_2$  catalysts, both powdered and supported ( $\text{Ni/CeO}_2$ -carbon monolith).

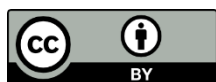

© 2020 by the authors. Submitted for possible open access publication under the terms and conditions of the Creative Commons Attribution (CC BY) license (<http://creativecommons.org/licenses/by/4.0/>).
